# Análisis de sequías históricas a través de los impactos derivados

## *Analysis of historical droughts through their induced impacts*

Sainz de la Maza, M. <sup>a1</sup>, del Jesus, M. <sup>a2</sup>

<sup>a1</sup>Instituto de Hidráulica Ambiental, Universidad de Cantabria - Calle Isabel Torres nº15, Parque Científico y Tecnológico de Cantabria, 39011, Santander, España.

E-mail: <sup>a2</sup>manuel.deljesus@unican.es.

Recibido: 05/08/2019

Aceptado: 08/07/2020

Publicado: 31/07/2020

**Citar como:** Sainz de la Maza, M., del Jesus, M. 2020. Analysis of historical droughts through their induced impacts. *Ingeniería del agua*, 24(3), 141-156. <https://doi.org/10.4995/ia.2020.12182>

---

## RESUMEN

A pesar de que hoy en día la identificación y caracterización de sequías sigue siendo un proceso no estandarizado, lo más habitual es utilizar índices como el SPI o el SPEI entre otros. En este estudio se han analizado sequías históricas, no solo a través de los índices SPI y SPEI, sino también a través del índice SSMI, con series de humedad de suelo simuladas con el modelo hidrológico *Variable Infiltration Capacity* (VIC). El objetivo es mostrar la importancia de considerar la humedad del suelo en estudios de sequías. La ocurrencia de las sequías se ha determinado a través de los impactos económicos y agrícolas generados, y no únicamente a través del déficit hídrico. Se puede concluir que la humedad del suelo es un factor determinante en el estudio del impacto de la sequía en la producción de cereales y especies de grano grueso, pero no en las pérdidas económicas inducidas.

**Palabras clave** | sequía; España; SPI; SPEI; SSMI; VIC; humedad del suelo; impactos económicos; producción agrícola.

---

## ABSTRACT

*Nowadays, the identification and characterization of droughts is not yet a standardized process, in most cases, indices such as SPI or SPEI are used for this task. In this study, historical droughts are analyzed, not only through SPI and SPEI, but also using SSMI computed with soil moisture time series simulated with the VIC hydrological model. The main objective is to show the importance of considering soil moisture in the study of droughts. Drought occurrence was determined through the impacts of past droughts and not only through the deficit they produce at some point in the water balance process. We conclude that soil moisture is a key factor in the production of cereals and gross grain species but is not relevant for economic impacts.*

**Key words** | drought; Spain; SPI; SPEI; SSMI; VIC; soil moisture; economic impacts; agricultural production.

## INTRODUCCIÓN

Las sequías se caracterizan por un déficit hídrico, inicialmente desencadenado por la falta de precipitación. Es por ello que muchos estudios de sequías se han centrado en identificar y caracterizar estos eventos únicamente a través del déficit de precipitación o del balance de agua en el suelo (Vicente-Serrano et al., 2010). Sin embargo, la sequía es un proceso muy complejo en el que no solo la precipitación tiene importancia. El aumento de la temperatura del aire y el consecuente aumento de la evapotranspiración (King et al., 2015), los descensos en la humedad del suelo o los cambios en los usos del suelo tienen también mucha importancia y se han de tener en cuenta a la hora de realizar estudios de sequías (Van Loon et al., 2016).

Los estudios de sequías suelen realizarse haciendo uso del llamado método de umbrales, a través del cual se pueden obtener propiedades de esta como son la intensidad, la severidad, la frecuencia y la duración de un determinado evento. Dada una serie temporal de una variable de interés (precipitación, escorrentía, caudal), estas características se derivan del establecimiento de un umbral por debajo del cual se considera que se produce un déficit de la variable de estudio. Sin embargo, análisis de este tipo presentan varios problemas. Por un lado, el establecimiento de ese umbral sigue siendo una cuestión arbitraria, o al menos subjetiva, y depende del objetivo del estudio que se esté realizando (Fleig et al., 2006; Beyene et al., 2014). El umbral se define a través de un percentil, que suele variar entre un 70 y un 95. Es importante destacar que una mala elección del umbral puede llevar a una mala identificación y caracterización de los eventos producidos en un intervalo de tiempo (Van Loon et al., 2010; Sheffield y Wood, 2011). Por otro lado, incorporar la dimensión espacial a los estudios de sequías no es una tarea sencilla y pese a ello es un aspecto crítico a la hora de definir correctamente una situación de sequía (Mishra y Singh, 2011).

Existen más de 150 índices en la literatura y cada uno de ellos es adecuado para representar uno o dos tipos de sequía –meteorológica, hidrológica, agrícola o socioeconómica–. Los índices son, en principio, dependientes de la zona de estudio. Por ejemplo, se ha visto que con el Índice Estandarizado de Precipitación-Evapotranspiración (SPEI – *Standardized Precipitation-Evapotranspiration Index*) (Vicente-Serrano et al., 2010) se obtienen buenos resultados en la península ibérica entre otras zonas (Beguiría et al., 2014). No obstante, hay ciertos índices que son muy utilizados globalmente. Por ejemplo, el Índice de Precipitación Estandarizado (SPI – *Standardized Precipitation Index*) (McKee et al., 1993) o el Índice de Severidad de Palmer (PDSI – *Palmer Drought Severity Index*) (Palmer, 1965) reproducen relativamente bien situaciones de sequía en diferentes partes del mundo encontrando, sin embargo, diferencias en los resultados obtenidos con unos y otros índices (Vicente-Serrano et al., 2012; Homdee et al., 2016; Liu, et al., 2018).

Una ventaja del estudio de sequías a través de índices es que permite cuantificar la severidad de las sequías. Tradicionalmente, sequías muy severas han producido grandes pérdidas de producción agrícola, tanto de regadío como de secano, que se han traducido en grandes pérdidas económicas (Lopez-Nicolas et al., 2017). La predicción estacional permite reducir el impacto de sequías menos severas mediante adaptaciones de los cultivos por parte de los agricultores. En el estudio realizado por Kim et al., 2019, queda reflejada la importante pérdida de rendimiento que generan las sequías en los cuatro productos más relevantes a nivel mundial: arroz, maíz, soja y trigo. De estas cuatro especies, únicamente dos son relevantes en España: el maíz y el trigo. En el año 2018, en España se regó un 22% de la superficie total cultivada; en el caso del maíz, solo un 8.65%. En el caso del trigo este valor desciende a un 0.77% (ESYRCE, 2018). Estos datos reflejan la importancia que aún tiene el cultivo de secano en los principales cultivos en España y, por tanto, la sensibilidad frente a la sequía que tiene la producción agrícola.

A pesar del conocido impacto económico que generan las sequías, en España no se comenzó a asegurar la producción contra la sequía hasta el año 1980, lo que limita la duración de las series que podemos analizar. Además, es un riesgo muy complicado de asegurar, y cuantificar, debido a que no es un riesgo delimitado en tiempo y en espacio, haciendo que no se pueda establecer de forma precisa el inicio y final de los daños que esta provoca. En la actualidad, se aseguran cultivos extensivos de secano de tipo herbáceo (cebada, trigo, avena, arroz...), uva de vinificación, olivar, frutos secos, maíz y remolacha (Ollero Lara et al., 2018) y la cobertura del riesgo de sequía se considera junto con otras adversidades climáticas como heladas o granizo. Es importante destacar que las otras adversidades climáticas aseguradas provocan daños mucho más fácilmente delimitables en espacio y tiempo.

En este trabajo analizamos sequías históricas en la España peninsular utilizando los índices SPI, SPEI y SSMI (*Standardized Soil Moisture Index*) (Carrão et al., 2016), tanto a nivel agregado como distribuido en el espacio. Las sequías históricas se determinan a través de los impactos que estas generaron a nivel económico, estudiando la capacidad de cada índice de predecirlas. Se comparan

los resultados de los tres índices para identificar la sensibilidad de las sequías a la precipitación, temperatura y humedad del suelo. Para el estudio del SSMI, la humedad del suelo se obtuvo a través del modelo *Variable Infiltration Capacity* (VIC). Además, se ha estudiado la correlación entre los índices y las series temporales, con los impactos económicos y agrícolas generados por los eventos históricos identificados. En términos agrícolas, se ha estudiado el impacto de las sequías en los principales grupos de especies de cultivo en España.

Con este estudio se pretende establecer una metodología que ayude a la correcta definición y caracterización de las grandes sequías, a través del impacto real que generan en la producción agrícola y la economía de España, utilizando índices clásicos como medios de predicción. No se consideran las dinámicas agrícolas de adaptación de cultivo a las condiciones estacionales predichas -cambiando el cultivo típico por uno mejor adaptado a las condiciones climáticas predichas-, interesándonos únicamente por aquellas sequías no mitigables.

## CASO DE ESTUDIO

### Zona de estudio

El estudio se centra en la España peninsular. La precipitación en la península ibérica es muy variable en espacio y tiempo, debido a su diversidad climática y a su configuración orográfica. La precipitación decrece de norte a sur. En el norte, la precipitación media anual en el período de referencia 1981-2010 es de 1300 mm, mientras que en el centro y en el sur este valor se sitúa en unos 550 mm. Además, España tiene una fuerte variación estacional de la precipitación media. En los meses de invierno, la precipitación media histórica ha sido de unos 75 mm al mes mientras que en verano estos valores descienden hasta los 20 mm. En cuanto a la temperatura, la distribución de las isotermas medias anuales reproduce bastante bien el mapa hipsométrico, con temperaturas medias más bajas en las zonas con mayor altitud. Además, también se observa una fuerte variación estacional en la temperatura, alcanzando los valores medios máximos en verano. Esta climatología lleva a que los períodos más secos correspondan a los meses de julio y agosto mientras que los más húmedos sean los correspondientes al período de noviembre a febrero. En la Figura 1.a y la Figura 1.b. se muestran los ciclos medios anuales en el período histórico de las variables usadas en este estudio: precipitación, temperatura, evapotranspiración potencial y humedad del suelo. Se puede observar que la humedad del suelo y la precipitación media del período histórico tienen una forma similar, pero con un retraso de 1 mes.

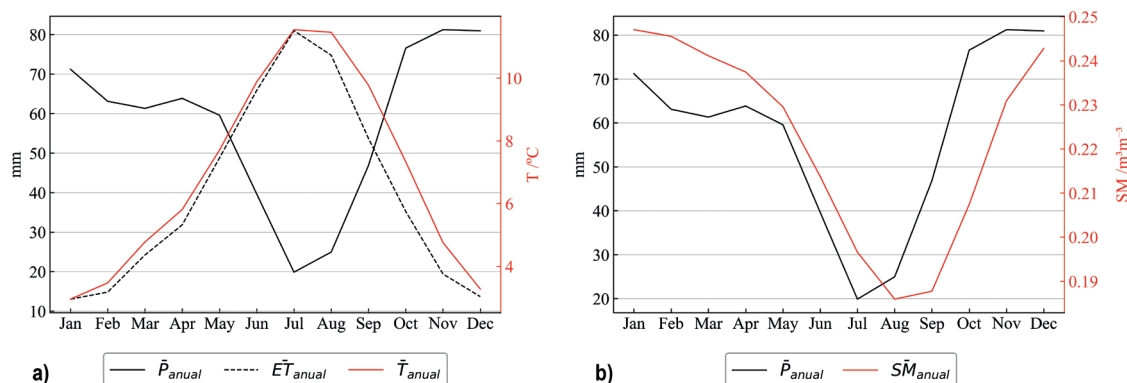

Figura 1 | Ciclos anuales medios de las variables climáticas de estudio en el período histórico de estudio.

### Datos

En este estudio se han utilizado las series temporales de las variables climáticas observadas precipitación y temperatura de la base de datos Spain02 versión v5 (Herrera et al., 2012; Herrera et al., 2016). Estas series corresponden a datos a escala diaria en

un mallado de resolución espacial de 0.1 grados para el mallado regular y 0.11 grados para el mallado rotado. Para este estudio, se ha tomado la malla regular. Tanto la precipitación como la temperatura tienen una cobertura temporal desde 1951 hasta 2015.

Para forzar el modelo VIC se necesitan, además, otras variables climáticas adicionales como la radiación, cobertura de nieve y viento entre otras. Éstas han sido obtenidas del *Research Data Archive* que gestiona el National Center for Atmospheric Research (NCAR), que proporciona series temporales de reanálisis (CFSR – *Climate Forecast System Reanalysis*) de muchas variables climáticas. Estas series son series continuas de 32 años de duración cubriendo el período 1971 - 2011 y están disponibles a varias resoluciones espaciales. Para este estudio se ha utilizado la resolución espacial más fina disponible. Por otro lado, se necesita información litológica y edafológica, obtenida de la base de datos *Global Soil Dataset for Earth system modeling* (GSDE); datos de cobertura y usos del suelo, obtenidos a partir del *Corine Land Cover* (CLC) con resolución de 500 m; LAI (*Leaf Area Index*), procedente del *Copernicus Global Land Service* (CGLS) disponible a resolución temporal mensual y espacial de 0.01 grados; y albedo, obtenido de la base de datos *Global Land Cover Facility*, disponible a la misma escala espacio-temporal que el LAI. Todas las bases de datos han sido interpoladas a una resolución de 0.042° (~5 km), que es a la que se ha ejecutado el modelo VIC.

Con el objetivo de verificar la bondad de las series de humedad del suelo simuladas, se han empleado datos de humedad de suelo de satélite, concretamente, la versión 04.4 de la Iniciativa de Cambio Climático (CCI) de la Agencia Espacial Europea (ESA). Esta base de datos está basada en la versión 03.3 y está compuesta de tres productos: activo (a partir de datos de sensor radiométrico), pasivo (a partir de datos de radar) y combinado. La principal diferencia respecto a versiones anteriores es que el producto combinado se crea a partir de los datos de nivel 2 disponibles (humedad de suelo medida por sensores radar y humedad del suelo de radiómetro) y no como combinación de la parte activa y pasiva. Se proporcionan en una malla regular de 0.25°, cobertura global y período de 1978 hasta la actualidad. Está disponible a resolución diaria, 10-diaria y mensual. Además, la base de datos está compuesta por varios datos como son el porcentaje de humedad del suelo (%), la humedad del suelo volumétrica ( $\text{m}^3 \text{m}^{-3}$ ) y la incertidumbre, en una capa de 2 a 5 cm de profundidad. En este estudio se ha utilizado el producto combinado a resolución temporal mensual. No se han considerado los productos activo y pasivo dado que el producto combinado representa adecuadamente los datos de humedad de suelo observada en ciertas áreas de la zona de estudio (González-Zamora et al., 2019).

**Tabla 1** | Sequías históricas producidas en la España peninsular.

| Inicio | Final | Datos agrícolas | Datos económicos |
|--------|-------|-----------------|------------------|
| 1953   | 1954  | No              | No               |
| 1964   | 1964  | Sí              | No               |
| 1973   | 1974  | Sí              | No               |
| 1980   | 1984  | Sí              | No               |
| 1990   | 1995  | Sí              | Sí               |
| 2005   | 2005  | Sí              | Sí               |
| 2012   | 2012  | Sí              | Sí               |

Para la identificación de sequías históricas se han utilizado principalmente dos fuentes de datos. Por un lado, se ha utilizado la base de datos *Emergency Event Database* (EM-DAT), que recoge información de distintas fuentes de datos (organizaciones no gubernamentales -ONG-, centros de investigación, aseguradoras, etc). Esta base de datos es global y aunque identifica algunas de las fuertes sequías que ha habido en España, la información es escasa. Por otro lado, se ha utilizado un estudio realizado por la Entidad Estatal de Seguros Agrarios (ENESA) (Ollero Lara et al., 2018) en el que se recoge información de secuencias de sequías históricas en España, así como períodos de sequía en la zona norte de la Península y lluviosos en el sur y viceversa. En la Tabla 1 se muestran los eventos de sequía identificados en el período y la zona de estudio.

Además, en este estudio se recogen datos de parámetros económicos del Consorcio de Compensación de Seguros desde el año 1980. El Consorcio de Compensación de Seguros es un reasegurador obligatorio de carácter público al que todas las pólizas deben contribuir mediante un recargo como aportación a la reserva de estabilización del Consorcio. La reserva se crea con el objetivo de compensar las desviaciones desfavorables de la siniestralidad en cada año, en caso de que las haya. En la Figura 2 se muestran

las series temporales de las primas recibidas e indemnizaciones realizadas. En los años en los que las indemnizaciones superan las primas recibidas, se considera que ha habido una desviación de la siniestralidad desfavorable. En el estudio, se identifican los años 1986, 1992, 1995, 1999, 2005 y 2012 como años con elevados daños por sequía coincidiendo con la existencia de picos sobre el comportamiento medio de la serie.

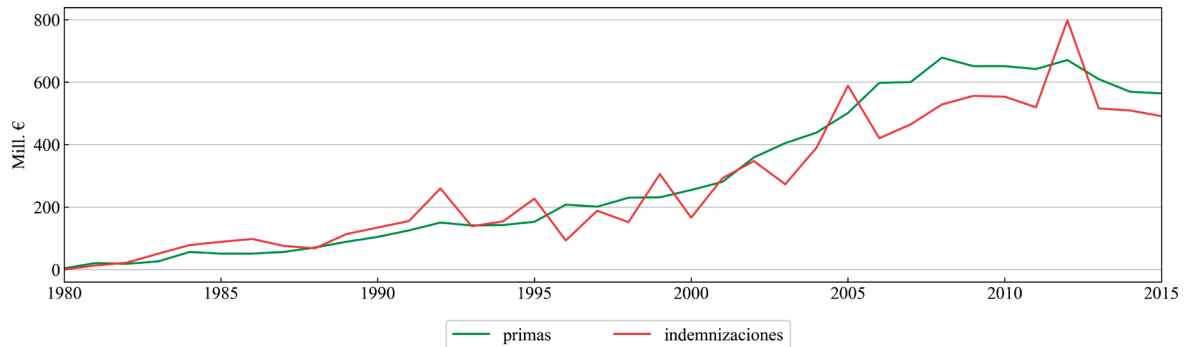

**Figura 2 |** Primas e indemnizaciones frente a daños agrícolas realizadas por el Consorcio de Compensación de Seguros (Fuente: ENESA).

Estos datos han sido utilizados para correlacionar el impacto económico producido por las sequías mostradas en la Tabla 1 con los índices de sequía SPI, SPEI y SSMI. Asimismo, se ha estudiado la correlación entre los daños económicos producidos en los años de sequía con la producción agrícola en esos años. Los datos de producción agrícola han sido descargados de la Organización de las Naciones Unidas para la Alimentación y la Agricultura (FAOSTAT). Esta base de datos está formada por tres series de datos: producción agrícola (toneladas), área sembrada (hectáreas) y rendimiento (toneladas por hectárea) por tipo de especie y agregada a cada país desde 1961 a 2017. Además, ofrece la posibilidad de descargarse varias especies agrupadas. En este estudio, se ha hecho uso de la modalidad de bases de datos agrupadas en series temporales desde 1961 hasta 2015, límite impuesto por la base de datos de precipitación y temperatura.

## METODOLOGÍA

### Modelo hidrológico

El modelo hidrológico VIC es actualmente uno de los más aplicados a predicción de clima y cambios en la cobertura del suelo (Gayathri et al., 2015). Es un modelo semi-distribuido que se puede utilizar en dos modos, balance de agua y balance de energía. Utiliza precipitación, temperatura diaria y velocidad del viento entre otras variables, y permite la definición de muchos tipos de cobertura suelo. Es un modelo híbrido entre físico y conceptual ya que la infiltración, escorrentía, etc. están basadas en ecuaciones empíricas. A pesar de deficiencias tales como no reproducir interacciones entre el agua del subsuelo y la superficie, o no tener un mecanismo explícito para producir exceso de infiltración, el VIC es un modelo muy utilizado en estudios de sequías (Trambauer et al., 2014).

En este estudio, el modelo VIC se ha utilizado en su modalidad de balance de agua. Para ello, el modelo VIC resuelve la ecuación de continuidad de la masa en cada paso de tiempo entre los inputs (precipitación) y los outputs (evaporación, escorrentía y flujo base). La evaporación se calcula como suma de la evaporación del agua desde tres sistemas: cubierta vegetal, transpiración y suelo desnudo. Para el cálculo de la evapotranspiración potencial utiliza la fórmula de Penman-Monteith.

Las simulaciones se han realizado a escala diaria y a resolución espacial de  $\sim 0.05$  grados (aproximadamente 5 km). La calibración del modelo VIC se suele realizar variando 6 parámetros, entre los que está la profundidad del suelo. En este caso, se ha asumido una profundidad constante en todas las celdas, sin realizar ninguna calibración para, posteriormente, realizar una corrección de las series obtenidas. A pesar de que la humedad de suelo de satélite mide la cantidad de agua en una profundidad de 5 a 10 cm, en este estudio se han simulado todas las celdas con una profundidad de la primera capa de 1 m. Se ha realizado así

debido a que la simulación con una capa superficial de 10 cm generaba mucho ruido sobre el comportamiento medio de las series simuladas. Con una profundidad de 1 m se ha conseguido simular ese comportamiento medio más suavizado y que se ha observado que reproduce mejor las condiciones medidas con satélite.

## Índices de sequía

En el presente estudio se han utilizado los índices SPI, SPEI y SSMI a agregaciones espaciales de 1, 3, 6, 9 y 12 meses. Los tres índices poseen el mismo método de cálculo, el cual se basa en calcular cuánto se desvía cierta variable respecto de la media histórica. En el caso del SPI la variable usada es la precipitación ( $P$ ), en el caso del SPEI es la diferencia entre la precipitación y la evapotranspiración potencial ( $P - ET_0$ ) y para el caso del SSMI se hace uso de la humedad del suelo ( $SM$ ). El cálculo se realiza ajustando una función de densidad de probabilidad (FDP) a la serie histórica para después transformarla en una distribución normal de media cero y desviación uno, que es la que proporciona el valor de los índices. En el caso de los índices SPI y SSMI los autores recomiendan ajustar una FDP de tipo gamma (McKee et al., 1993; Carrão et al., 2016), mientras que en el caso del SPEI la función más adecuada es una log-logística (Vicente-Serrano et al., 2010). En el presente estudio se han realizado los cálculos siguiendo dichas recomendaciones.

Los tres índices de sequía se han calculado a partir de datos mensuales, es decir, se han obtenido 12 funciones de densidad de probabilidad, una por mes. Las variables precipitación y temperatura se proporcionan directamente como valores mensuales mientras que la humedad del suelo media mensual ha sido obtenida a partir de simulaciones diarias del modelo hidrológico VIC. Para verificar la bondad de las series de humedad de suelo obtenidas, se han comparado con las series de humedad del suelo de satélite a través del coeficiente de correlación  $r$  de Pearson.

Puesto que el comportamiento hidrológico en España no es uniforme en todo el territorio, habiendo zonas más susceptibles de sufrir sequía, como es la zona sureste de la Península, la evaluación realizada está basada en un análisis distribuido de los índices SPI, SPEI y SSMI. Para el estudio comparativo entre los tres índices, se han calculado los valores medios mensuales para todo el período de estudio píxel a píxel y en cinco períodos de agregación a 1, 3, 6, 9 y 12 meses. Así, se han obtenido 15 índices por píxel de la malla de VIC cuya correlación se ha estudiado nuevamente a través del coeficiente de correlación  $r$  de Pearson. Este análisis se ha realizado tanto para toda la serie histórica como agrupada por meses, dando lugar a matrices de correlación de dimensión 15 x 15. El estudio distribuido permite, además, identificar qué áreas de la zona de estudio son más sensibles a cada variable (precipitación, temperatura y humedad del suelo) y a cada período de agregación.

Los datos económicos y agrícolas se tienen agregados espacialmente y en series anuales. Por tanto, este estudio permite identificar y cuantificar el impacto de las grandes sequías sufridas en todo el territorio español y no de sequías locales. Para poder cruzar los datos de índices con los económicos y agrícolas, se han calculado series anuales para las agregaciones de 1, 3, 6, 9 y 12 meses para cada uno de los índices. Se parte, entonces, de series mensuales de los índices que se han de convertir en series anuales. Para cada año, se tienen 12 valores de cada índice (uno por mes) pero finalmente se han creado un total de 20 series temporales por año. Éstas, corresponden a los 12 valores de cada mes y a los estadísticos correspondientes a la media anual, mediana anual, máximo y mínimo anuales, y la media aritmética de 3 meses consecutivos (EFM, AMJ, JAS, OND) para ver posibles correlaciones estacionales. Se ha seguido esta metodología de cálculo para determinar si hay algún mes más relevante que el resto o si, por el contrario, el comportamiento económico y agrícola responde mejor a un comportamiento medio (media, mediana, estacional) o extremo (máximo o mínimo) de los índices. Todas las series agregadas han sido calculadas como la media aritmética de los valores en cada píxel y teniendo, en total, 20 series  $\times$  5 agregaciones  $\times$  3 índices (300 series temporales) para toda la península ibérica.

## Análisis de impactos

Para cada una de las 20  $\times$  5 series temporales de cada índice, se ha estudiado qué serie correlaciona mejor con la producción agrícola y los impactos económicos reportados. Esta correlación se ha obtenido a través del coeficiente  $r$  de Spearman, que mide la interdependencia de dos variables aleatorias cuya relación es monótona pero no necesariamente lineal. Cuando la relación es lineal, el coeficiente  $r$  de Spearman corresponde al coeficiente  $r$  de Pearson.

Para realizar la correlación de los índices con datos económicos, se ha trabajado con las indemnizaciones porque estas representan el pago por cobertura del impacto directo de la sequía. Como la sequía es un riesgo que se asegura junto con otras inclemencias meteorológicas mucho más fácilmente delimitables en espacio y tiempo, se ha considerado que el comportamiento medio de la serie de indemnizaciones es un riesgo fácilmente predecible. Por tanto, la serie original ha sido tratada para obtener las desviaciones sobre el comportamiento medio eliminando, además, la tendencia creciente que se observa en la Figura 2. Así, la serie original ha sido estandarizada según la Ecuación (1),

$$I_s = \frac{y_d - \mu}{\sigma} \quad (1)$$

donde  $I_s$  se refiere a la indemnización estandarizada,  $y_d$  son las desviaciones sobre el riesgo efectivo una vez eliminada la tendencia,  $\mu$  es la media de las desviaciones y  $\sigma$  es la desviación estándar de las desviaciones. Esta estandarización lleva los términos económicos a valores en la misma escala que los índices de sequía.

Las series temporales de producción agrícola se tienen desde el año 1961, por tanto, se ha realizado un análisis semejante al económico, pero más extenso, con cada uno de los grupos de especies de producción agrícola. Es importante destacar que las series temporales de producción agrícola también poseen una tendencia positiva, en la mayor parte de los casos creciente, tal y como se observa en la Figura 3, donde se muestra un ejemplo para todos los grupos de especies.

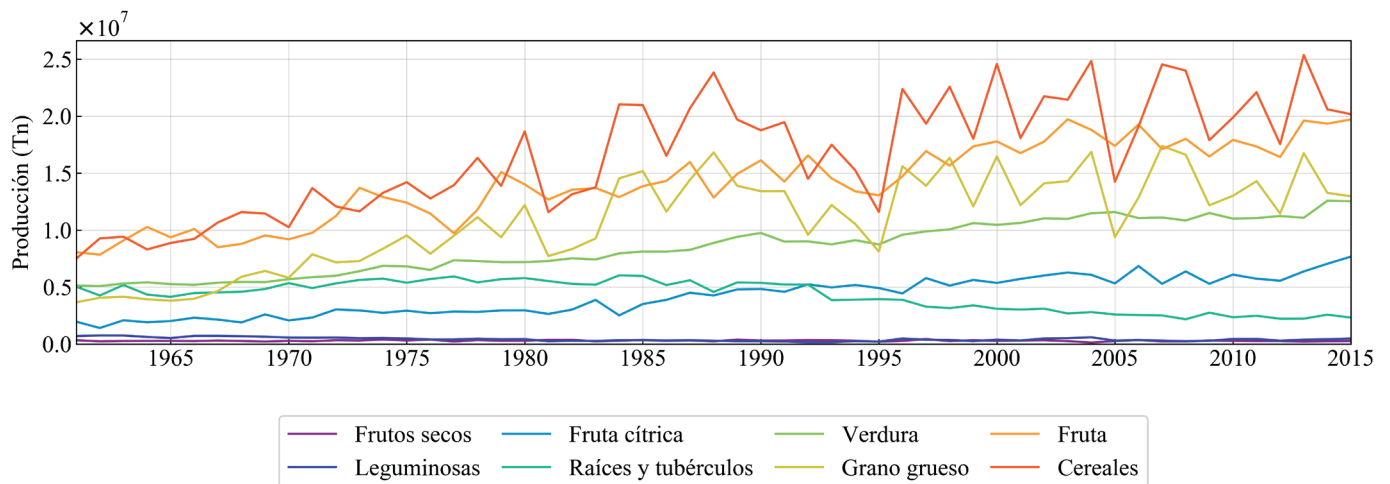

**Figura 3** | Evolución temporal de la producción agrícola en España desde 1961 hasta 2015.

Esta tendencia se ha considerado de índole no climática, debido a la innovación tecnológica producida en la agricultura. Los datos de producción se han comparado por un lado con los datos de desviaciones económicas, y con los índices de sequía por otro. A la hora de comparar la producción agrícola con los datos económicos, lo que permite saber qué especies provocan mayores pérdidas económicas, se han comparado las series originales únicamente extrayendo su tendencia. Sin embargo, a la hora de comparar con índices climáticos se ha utilizado el rendimiento de la producción, transformando también las series de rendimiento en series estandarizadas a través de la Ecuación (1). Para este caso, es el valor residual de producción una vez eliminada la tendencia, es la media de los valores residuales de producción y es la desviación estándar del valor residual de producción. Con esta estandarización, es posible comparar la producción entre diversas especies o grupos de especies.

La relación entre cada índice y las series de producción estandarizadas se ha evaluado también a través del coeficiente  $r$  de Spearman, dada la no linealidad en la relación entre índices de sequía y producción agrícola. Por último, para cada evento histórico, se ha observado qué valor de desviación económica y de producción hubo en esos años, estudiando el comportamiento de los índices en eventos de sequía.

## RESULTADOS

### Índices de sequía

#### Correlación de índices de sequía

Las simulaciones realizadas con el modelo VIC están a una resolución de  $0.05^\circ$  mientras que la humedad del suelo de satélite se encuentra a  $0.25^\circ$ . Para poder realizar una comparativa entre las series obtenidas y las de satélite, se ha agregado la humedad de suelo simulada a la resolución de satélite calculando la media aritmética de los valores de humedad de suelo de las celdas de simulación integradas en cada celda de satélite. En la Figura 4 se muestran los mapas de correlación y sesgo de las series de humedad de suelo simuladas respecto a las observadas. Se muestran correlaciones  $r$  de Pearson positivas significativas con  $p < 0.01$ . Se puede observar cómo las series tienen una alta correlación en la mayoría de la península ibérica ( $r > 0.6$  en más del 70% del área de estudio) a excepción de la zona centro-este ( $r < 0.4$  en aproximadamente un 7% de las celdas). En cuanto al sesgo que poseen las series simuladas, se puede observar cómo en varias zonas de la Península las series poseen un sesgo no despreciable.

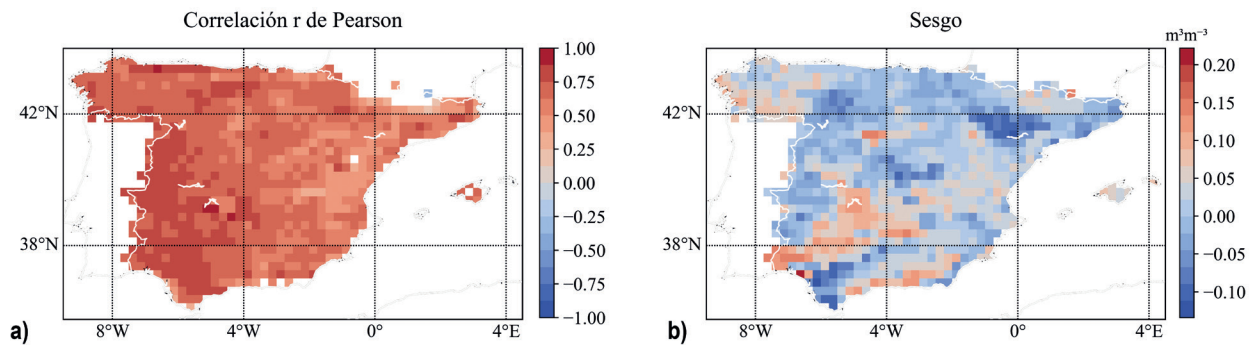

**Figura 4** | Mapas de a) correlación y b) sesgo de las series de humedad del suelo simuladas frente a las de satélite.

Como ya se ha comentado, la profundidad a la que está medida la humedad del suelo de satélite es diferente a la de las series simuladas. Por tanto, se ha aplicado una corrección de sesgo a las series simuladas de tipo lineal según la Ecuación (2):

$$SM_{sc} = (SM_s - a) b + c \quad (2)$$

Donde  $SM_s$  es la humedad del suelo simulada,  $SM_{sc}$  es la humedad del suelo corregida y  $a$ ,  $b$  y  $c$  son factores correctores del sesgo y amplitud de la señal. Los coeficientes se ajustan minimizando el error medio cuadrático entre la serie observada y la corregida mediante un algoritmo genético. En la Figura 5 se muestra un ejemplo de una serie de humedad del suelo antes y después de ser corregidas en una celda al suroeste de la Península, donde encontramos los mayores valores de sesgo.

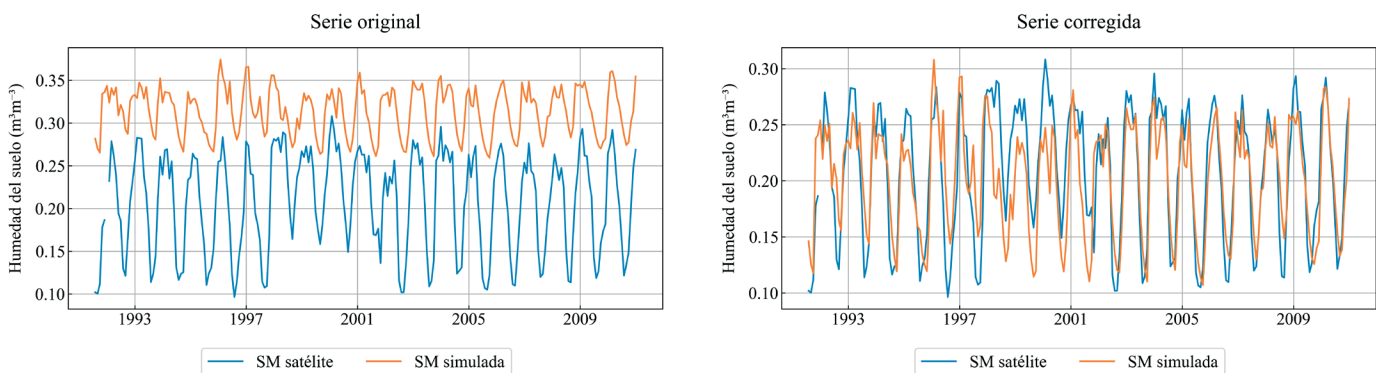

**Figura 5** | Ejemplo de una serie de humedad de suelo de satélite vs. Simulada antes (izquierda) y después (derecha) de aplicar la corrección.



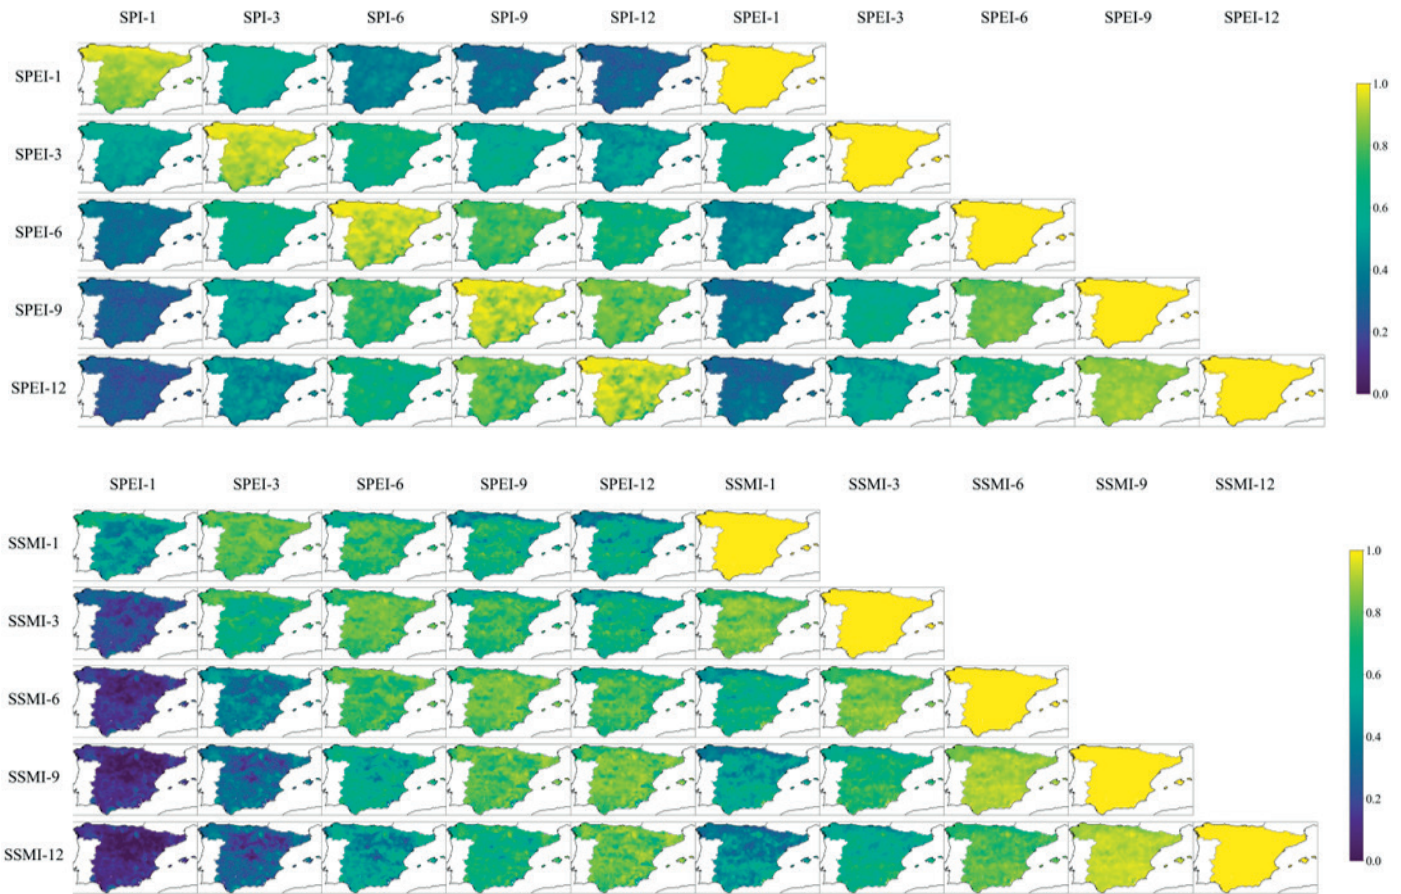

**Figura 6** | Matrices de correlación de los índices SPI con SPEI (panel a) y SPEI con SSMI (panel b).

En la Figura 6 se muestran los mapas de correlación para los índices SPI con SPEI y SPEI con SSMI. No se muestran los mapas de correlación de SPI con SSMI porque son muy similares a los obtenidos entre SPEI y SSMI, dada la alta correlación entre los índices SPI y SPEI. La escala gráfica de presentación es de 0 a 1, para observar las diferencias de forma más clara dada la alta correlación existente entre alguna pareja de índices. En concreto, se puede observar la alta correlación de los índices SPI y SPEI cuando están agregados la misma escala temporal (Panel a). La correlación es total en prácticamente toda la franja norte. Esto puede ser debido al elevado volumen de lluvias, haciendo que sea una zona donde la evaporación carece de importancia respecto a la precipitación. Esta correlación va disminuyendo a medida que se avanza hacia el sur de la Península y reflejando, por tanto, la importancia de la temperatura frente a la precipitación. También se observa una correlación alta entre diferentes escalas temporales de los mismos índices (Paneles a y b). Así, la correlación entre el SPI-9 con SPI-12 y SPEI-9 con SPEI-12 es superior a 0.8 en prácticamente toda la Península. Esta situación sugiere que el comportamiento de estos índices a escala temporal de 9 meses no se ve muy modificado por lo que ocurre los 3 meses siguientes, pudiendo así determinar el comportamiento medio de un año a través de los anteriores 9 meses.

En general, se observa una mejor correlación en toda la zona peninsular para escalas de agregación con 3 meses de diferencia, es decir, SSMI-1 con SPI-3 y SPEI-3, SSMI-3 con SPI-6 y SPEI-6, etc. Esto indica que, en general, la humedad del suelo de cierto mes está condicionada por lo que llovió los 3 meses anteriores, la humedad del suelo agregada a 3 meses está relacionada con lo que llovió en los 6 meses anteriores, etc. Para ciertas localizaciones en la zona centro y sur de España, la humedad del suelo también se ve condicionada por la temperatura que hubo. Además, es notable la baja correlación existente entre el índice SPEI-1 con las agregaciones 3, 6, 9 y 12 del índice SSMI, indicativo de que la información de precipitación y temperatura de un mes no determina la humedad del suelo de los 3, 6, 9 o 12 meses anteriores. No obstante, para la misma escala

de agregación temporal, la correlación entre los índices SSMI con SPI y SPEI es progresivamente creciente cuanto mayor es la agregación temporal.

Por último, cabe destacar la alta correlación entre el índice SSMI a diferentes agregaciones temporales. Encontramos una fuerte correlación entre los índices SSMI-6 con SSMI-9 y SSMI-9 con SSMI-12, derivando de ella que la humedad media de una ventana temporal de 6 y 9 meses no se va a ver muy modificada por los 3 meses siguientes, pudiendo determinar la humedad media del suelo de un año completo a partir de los 9 meses anteriores. De hecho, se puede apreciar cómo los mapas de SPEI-12 correlacionan de forma prácticamente igual con los mapas de SSMI-9 y SSMI-12. Una excepción a este comportamiento se puede encontrar en la zona norte, donde se observa que la correlación es más baja que en la zona centro o sur de España. Se encuentra que esta situación es la contraria a lo que ocurriría con los mapas de correlación de los índices SPI con SPEI indicando que, en este caso, la humedad del suelo en la zona norte adquiere importancia respecto a las variables precipitación y temperatura.

### Agregación espacial

En la Figura 7 se muestran 12 de las 20 series temporales estudiadas para los índices SPEI y SSMI. Nuevamente el índice SPI no se muestra porque, como era de esperar tras observar la alta correlación de los índices SPI y SPEI en su forma distribuida, en su forma agregada son muy similares con ligeros cambios en la intensidad de los índices. Para cada índice, se tiene una serie histórica anual (eje de ordenadas) correspondiente a la agregación de cada índice en cada uno de los meses (eje de abscisas), generándose estas 12 series anuales de enero, febrero, marzo, etc. Se puede observar cómo, a medida que la escala de agregación aumenta, se van reconociendo fácilmente qué años fueron secos y qué años fueron húmedos. Además, para años secos, como por ejemplo el año 2005, se observa ese retraso de 3 meses del SSMI respecto a los índices SPI y SPEI, fundamentalmente para agregaciones a partir de 6 meses.

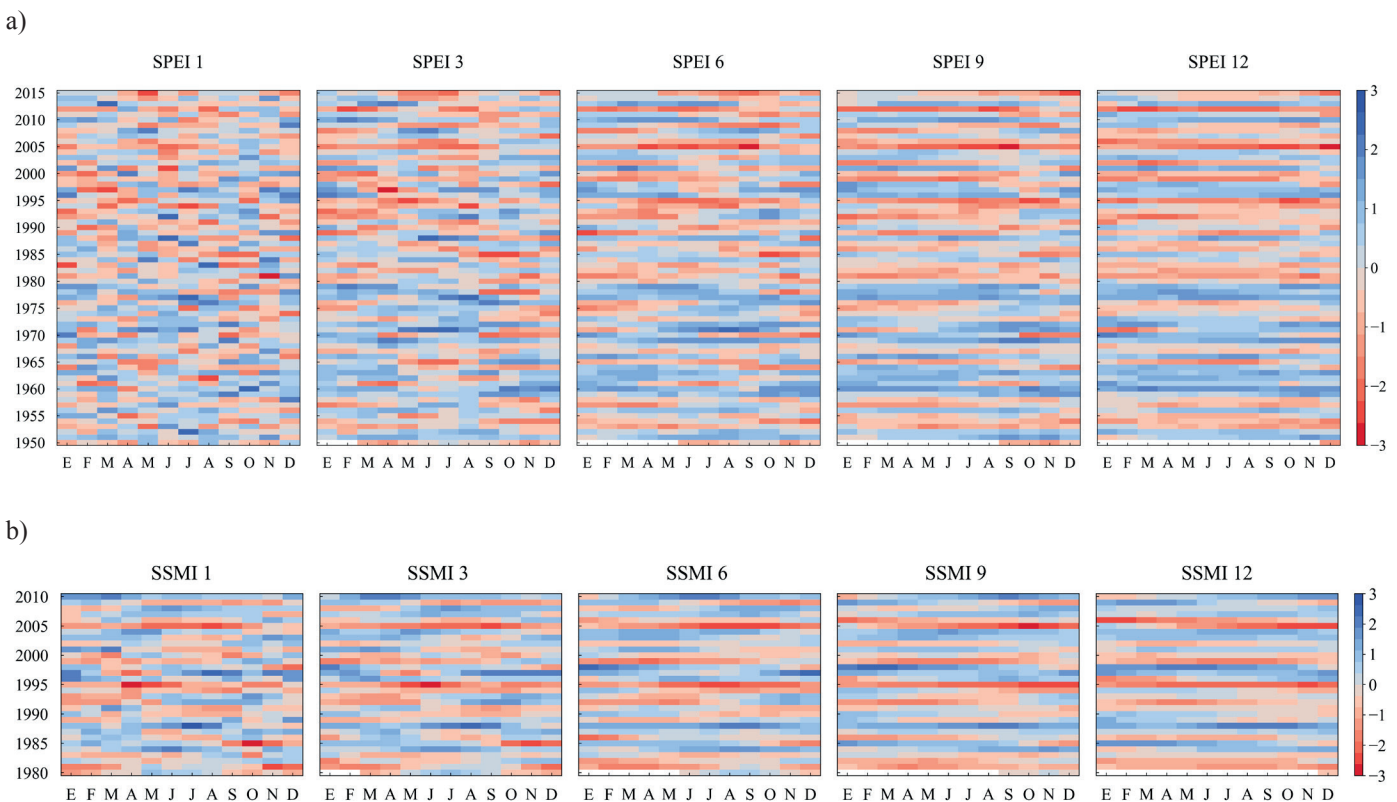

**Figura 7** | Series de los índices de sequía SPEI (panel a) y SSMI (panel b) agregados espacialmente a toda la península ibérica.

## Análisis de impactos

### Selección de la serie temporal óptima

Se ha realizado una correlación entre la producción y las indemnizaciones para así conocer qué grupos de especies son los que mejor correlacionan con las pérdidas económicas. A la vista de la Figura 3, se observa que las producciones de frutos secos y leguminosas generan un volumen mucho menor que los otros 6 grupos y, no obstante, las mejores correlaciones se obtienen para los grupos leguminosas ( $r = 0.60$ ), especies de grano grueso ( $r = 0.68$ ) y cereales ( $r = 0.67$ ). Esto indica que a pesar de que el impacto de la producción de leguminosas no es significativo del impacto económico total, la producción sí que se ve afectada económicamente de la misma manera que los grandes grupos. Esto indica que es un producto cuya sensibilidad a la sequía es semejante a la de los cereales. En la Figura 8 se muestran los 2 grupos de producción cuya correlación con las desviaciones del riesgo respecto del riesgo efectivo es más alta, ambas series con la tendencia corregida.

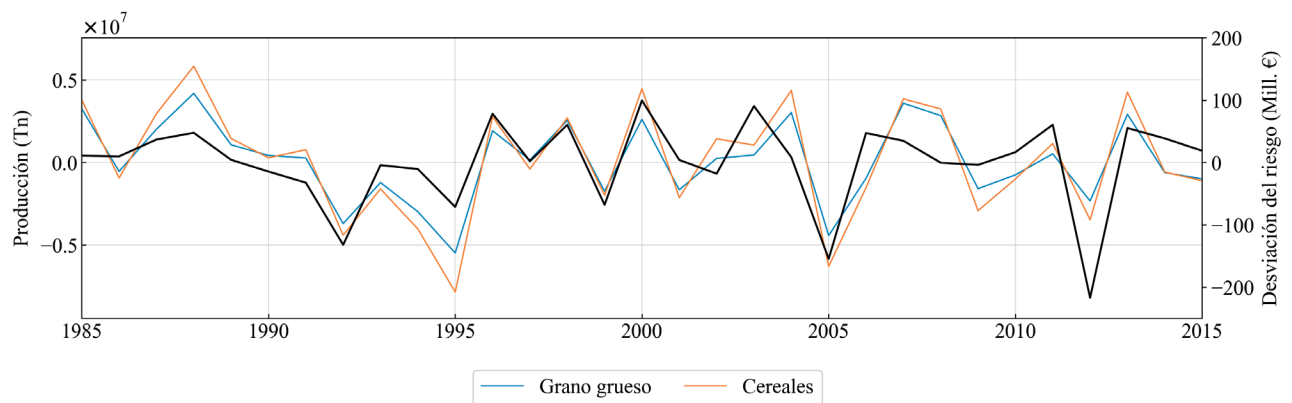

**Figura 8** | Representación gráfica de la evolución de los dos grupos de especies (grano grueso y cereales, eje de ordenadas a la izquierda de la figura) mejor correlacionados con la desviación del riesgo (línea negra, eje de ordenadas a la derecha de la figura), ambas series con la tendencia eliminada.

Tras analizar las 20 series temporales, se ha visto que las series creadas a partir de métricas estadísticas correlacionan peor que las 12 series anuales de cada mes. Por ello, en la Figura 9 se muestran únicamente las correlaciones de las 12 series temporales de enero, febrero, marzo, etc., con los datos económicos (arriba), producción de cereales (centro) y producción de especies de grano grueso (abajo). Además, se ha reflejado el valor que mejor correlaciona para cada agregación y cada índice.

A la vista de los resultados de la figura 9, se observa globalmente que los paneles de correlación de los índices con los rendimientos de las producciones de cereal (centro) y grano grueso (abajo) son muy similares. Esto indica que la forma en la que la precipitación, la temperatura y la humedad del suelo afectan a la producción de cereal y de grano grueso es similar. Sin embargo, estos dos paneles nada tienen que ver con el panel de desviaciones del riesgo (arriba), mostrando un comportamiento generalmente peor en términos de correlación.

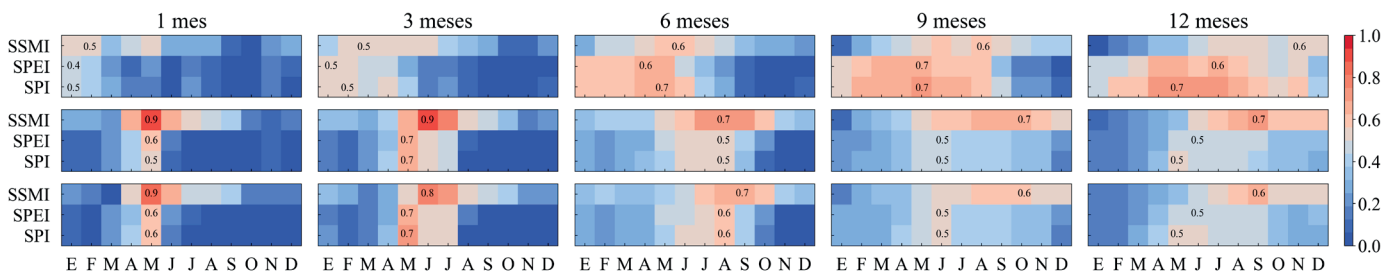

**Figura 9** | Valores de correlación  $r$  de Spearman para las 12 series anuales de enero (E), febrero (F), marzo (M), etc., con la serie de desviaciones económicas estandarizadas (arriba), con la serie de rendimiento estandarizado de la producción de cereales (centro) y con la serie de rendimiento estandarizado de la producción de grano grueso (abajo).

Para el panel de desviaciones económicas, las mejores correlaciones se obtienen para los índices SPI y SPEI a una agregación temporal de 9 meses para la serie de mayos. En el caso del SSMI, la mejor correlación se obtiene para una agregación de 6 meses y para la serie anual de junios. Estos resultados agregados son consistentes con todo lo comentado en el análisis desagregado con relación a la agregación temporal de 3 meses de diferencia que marcaba la mejor correlación entre los índices SPI y SPEI con el SSMI. A pesar de la alta correlación entre los índices SPI y SPEI, en general se obtienen valores de correlación más bajos para SPEI cuando se cruzan con datos económicos. Esta correlación es aún más baja en la mayoría de las agregaciones del índice SSMI, mejorando únicamente su correlación para una agregación de 1 mes. Además, se puede observar como a medida que aumenta el período de agregación la correlación mejora en la mayoría de las series. Esto indica que las desviaciones económicas no están influenciadas por lo que pueda ocurrir climáticamente un mes del año (de hecho, las correlaciones a agregación de 1 mes son muy bajas), sino que es el conjunto del clima de 9 y de 12 meses lo que marca la desviación económica de cierto año. En cualquier caso, se deduce de estos resultados que es el clima de septiembre a mayo el que mejor correlaciona con las desviaciones económicas de cierto año, sin tanta relevancia para la humedad del suelo. Ese resultado parece tener sentido si se relaciona con los calendarios de siembra de las especies aseguradas. Tanto en uno como en otro tipo, hay de invierno y de primavera. La variedad de invierno se siembra en otoño, entre el 1 de octubre y el 15 de noviembre mientras que la variedad de primavera se siembra del 15 de febrero al 1 de abril. El período crítico para la economía de las desviaciones del riesgo asegurado se produce exactamente en el período de siembra de ambas especies. Además, para la variedad de invierno también abarca su período de recolección.

Para el panel de rendimiento estandarizado de cereales, la mejor correlación se obtiene para el índice SSMI a una agregación temporal de 1 mes para la serie de mayos. En el caso de los índices SPI y SPEI se obtiene una correlación muy similar, siendo la mayor obtenida para la agregación de 3 meses y los meses de mayo. Nuevamente se observa la consistencia con los resultados obtenidos en el análisis desagregado. No obstante, destaca la alta correlación del índice SSMI, con un valor de  $r$  de Spearman de 0.92. Esto refleja la importancia que tiene la humedad del suelo en el mes de mayo en la producción de ese año. Este valor va descendiendo para los meses de verano y drásticamente para los meses de otoño e invierno, con resultados que no presentan apenas correlación con el rendimiento de la producción. Si se observa la Figura 1, donde se presentaban los ciclos de precipitación, temperatura y humedad del suelo de la serie histórica, se puede ver que, durante el período de siembra de las variedades de invierno, la precipitación adquiere valores máximos y la temperatura mínimos. Por tanto, es una variedad sembrada en época húmeda y cuyo crecimiento también se produce en una época húmeda. Sin embargo, la variedad de primavera se siembra cuando la precipitación comienza a descender y la temperatura a aumentar, con un crecimiento de la plantación que se va a producir en los meses de mayo y junio, meses en los que las precipitaciones comienzan a descender y la temperatura a ascender. Es, por tanto, un momento mucho más crítico para la producción que el momento en el que se plantan las variedades de invierno. De hecho, se observan también correlaciones altas para el SSMI-3 en estos meses calificados como críticos para la producción.

Por último, en el panel de rendimiento estandarizado de grano grueso, como se ha comentado, se obtiene una situación similar a la descrita en el párrafo anterior. La mayor correlación se obtiene nuevamente para el índice SSMI agregado a 1 mes para la serie formada por los mayos históricos. En general, los valores son algo más bajos que en el caso anterior, sin ser algo notable, pero que puede indicar mayor sensibilidad a la sequía de las especies englobadas en el grupo cereales que las englobadas en el grupo de grano grueso.

Con el objetivo de visualizar de forma gráfica las mejores correlaciones obtenidas, se ha representado en la Figura 10 las diferencias de las desviaciones en el riesgo (arriba), el rendimiento de cereales (centro) y rendimiento de grano grueso (abajo) con las series temporales de SPI, SPEI y SSMI que mejor correlacionan en cada uno de los 3 casos de estudio. Se puede observar el parecido entre las dos series de diferencias referidas a producción. Se puede observar una gran desviación en las series de desviaciones del riesgo de los tres índices en algunos años, como el año 2000. Si se observa la Figura 2, en ese año no solo no existe un pico, sino que parece una desviación favorable y, no obstante, los tres índices estudiados adquieren valores cercanos a -1. Esta situación representa una situación clara en la que el método de umbrales no habría resultado válido, indicando que es un año seco cuando en realidad no ha generado impacto en la economía. Esta situación se repite, aunque menos acentuada, en el caso del rendimiento de producción.

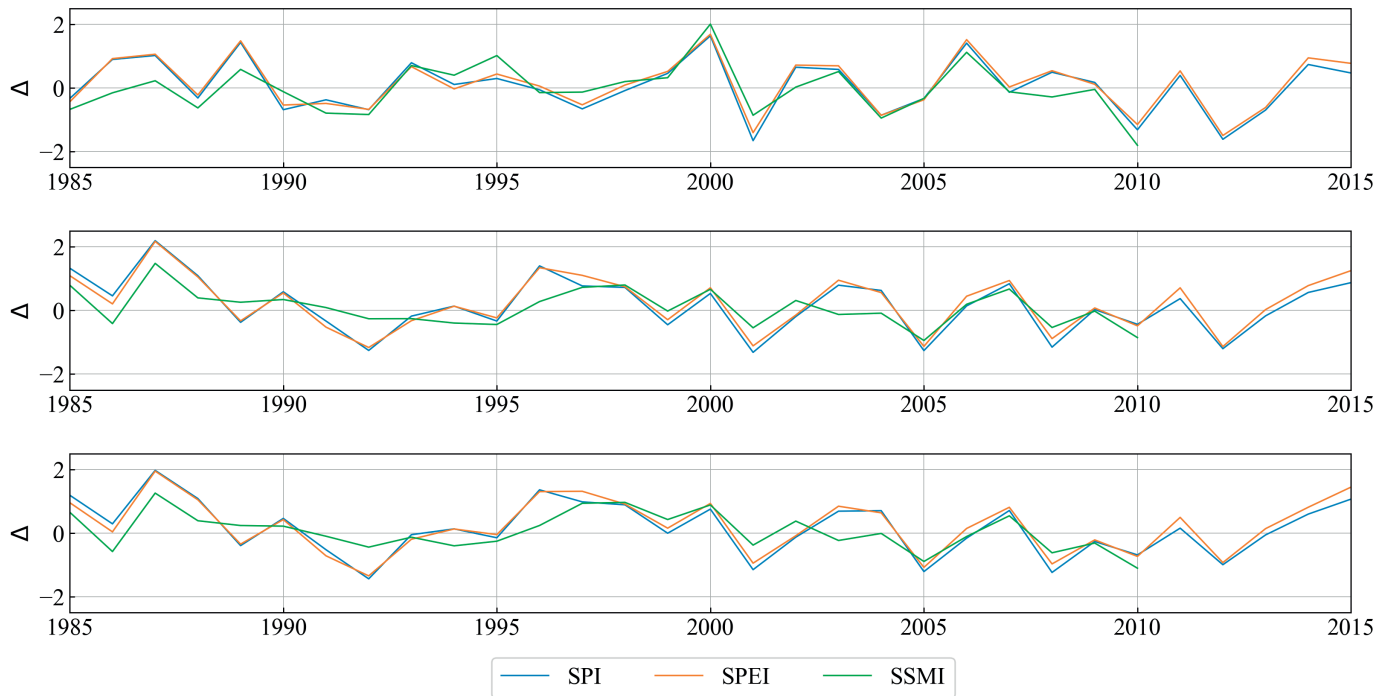

**Figura 10 |** Desviaciones en el riesgo (arriba), el rendimiento de cereales (centro) y rendimiento de grano grueso (abajo) con las series temporales de SPI, SPEI y SSMI que mejor correlacionan en cada uno de los 3 casos de estudio.

## DISCUSIÓN Y CONCLUSIONES

El estudio realizado ha permitido evaluar las grandes sequías históricas ocurridas en España desde el punto de vista de los impactos generados por estos eventos. Se ha comprobado cómo los 3 índices utilizados (SPI, SPEI y SSMI) tienen una estrecha relación con los valores de anomalías económicas y producción agrícola. La escala global del estudio realizado está condicionada por los datos económicos de partida, ya que pertenecen a reaseguradoras y éstas realizan indemnizaciones en situaciones extremadamente adversas. Por tanto, este estudio ha permitido identificar y cuantificar el impacto de las sequías sufridas en todo el territorio español y no de sequías locales.

Se ha observado cómo se produce un mismo comportamiento de los índices cuando estos están agregados espacialmente que en su forma desagregada. Así, las principales conclusiones obtenidas del estudio píxel a píxel son:

- un período de agregación de 9 meses es suficiente para representar el comportamiento anual de los 3 índices,
- los índices SPI y SPEI muestran correlaciones muy altas para los mismos períodos de agregación, siendo la temperatura una variable que afecta principalmente a la zona sur de España,
- el índice SSMI presenta correlaciones muy altas con los índices SPI y SPEI a períodos de agregación de 3 meses de diferencia, concluyendo de ello que, para la humedad del suelo, es más relevante la precipitación y temperatura de los 3 meses previos que del mes en curso o de épocas anteriores a 3 meses.

Para el cálculo del SSMI se han utilizado valores de humedad de suelo simulados y se ha comprobado su bondad con datos de satélite. Se ha visto que, en parte de las celdas de estudio, el valor de correlación es pobre. Esto puede ser debido a que los datos de satélite son incompletos y, en muchas de las celdas de estudio, hay huecos de más de un año de datos. No obstante, el comportamiento en la mayor parte de las celdas (más de un 70%) es bueno.

Del análisis de la relación de los impactos con los índices de sequía, se ha observado que los períodos de agregación que presentan más correlación con las desviaciones de riesgo estandarizadas son diferentes a los períodos de agregación que mejor se correlacionan con el rendimiento estandarizado de la producción. Por ello, identificar sequías a través de los impactos derivados requiere de un estudio específico del período de agregación que mejor lo representa.

En el caso económico, se ha obtenido la mejor correlación para períodos de agregación de 9 meses para el SPI y SPEI y de 6 meses para el SSMI, mostrando esa diferencia de 3 meses entre ambas agregaciones. No obstante, la humedad del suelo parece no ser determinante en la determinación del impacto económico derivado, puesto que su correlación y su coeficiente de determinación han mostrado valores muy pobres. Contrariamente, la precipitación y la temperatura sí parecen ser factores más importantes.

En el caso de la producción, la agregación que presenta mejor correlación es de 3 meses para SPI y SPEI y de 1 mes para SSMI, nuevamente con una diferencia de 3 meses, para los dos grupos de especies estudiados. De esta información se deriva la importancia que tiene la humedad del suelo en el mes de mayo para determinar la producción agrícola anual. Además, la correlación para el caso del SSMI resulta tener valores muy elevados, con lo que se concluye que la humedad del suelo es un parámetro muy importante que considerar en el análisis de sequías cuando se quiere evaluar los impactos reales que éstas generan en la producción de las especies más importantes de España.

De los 3 casos de estudio (económico, producción de cereales y producción de grano grueso), se observa que el SSMI es el índice que mejor se correlaciona de entre todas las relaciones estudiadas, ya que los valores obtenidos de correlación  $r$  y  $r^2$  de SPI y SPEI con datos económicos son mucho menores que aquellos obtenidos con el SSMI y datos de producción. Por tanto, queda patente la importancia de la humedad del suelo en el estudio de sequías.

---

## AGRADECIMIENTOS

Los autores agradecen al proyecto INDECIS, que forma parte de la iniciativa ERA 4CS, ERA-NET desarrollada por JPI Climate, y financiada por FORMAS (SE), DLR (DE), BMFWF (AT), IFD (DK), MINECO (ES), ANR (FR) y cofinanciada por la European Union (Grant 690462).

---

## REFERENCIAS

- AEMET. 2012. *Escenarios-PNAC*. [http://www.aemet.es/es/serviciosclimaticos/cambio\\_climat/datos\\_mensuales/ayuda](http://www.aemet.es/es/serviciosclimaticos/cambio_climat/datos_mensuales/ayuda); <http://www.meteo.unican.es/escenarios-pnacc>.
- Beguiría, S., Vicente-Serrano, S.M., Latorre Fergus Reig, B. 2014. Standardized precipitation evapotranspiration index (SPEI) revisited: parameter fitting, evapotranspiration models, tools, datasets and drought monitoring. *International Journal of Climatology* 34(10), 3001-3023. <https://doi.org/10.1002/joc.3887>
- Beyene, B.S., Van Loon, A.F., Van Lanen, H.A.J., Torfs, P.J.J.F. 2014. Investigation of variable threshold level approaches for hydrological drought identification. *Hydrology and Earth System Sciences Discussions*, 11, 12765-12797. <https://doi.org/10.5194/hessd-11-12765-2014>
- Carrão, H., Russo, S., Sepulcre-Canto, G., Barbosa, P. 2016. An empirical standardized soil moisture index for agricultural drought assessment from remotely sensed data. *International Journal of Applied Earth Observation and Geoinformation*, 48, 74-84. <https://doi.org/10.1016/j.jag.2015.06.011>
- ESYRCE. 2018. *Encuesta sobre Superficies y rendimientos*. Ministerio de Agricultura, Pesca y Alimentación.
- Fleig, A.K., Tallaksen, L.M., Hisdal, H., Demuth, S. 2006. «A global evaluation of streamflow drought characteristics.» *Hydrology and Earth System Sciences*. <https://doi.org/10.5194/hess-10-535-2006>

- Gayathri, K.D., Ganasri, B.P., Dwarakish, G.S. 2015. A Review on Hydrological Models. *Aquatic Procedia*, 4, 1001-1007. <https://doi.org/10.1016/j.aqpro.2015.02.126>
- Global Land Cover Facility*. 2018. <http://www.landcover.org/data/lai/>.
- González-Zamora, Á., Sánchez, N., Pablos, M., Martínez-Fernández, J. 2019. CCI soil moisture assessment with SMOS soil moisture and *in situ* data under different environmental conditions and spatial scales in Spain. *Elsevier*, 225, 469-482. <https://doi.org/10.1016/j.rse.2018.02.010>
- Herrera, S., Fernández, J., Gutiérrez, J.M. 2016. Update of the Spain02 Gridded Observational Dataset for Euro-CORDEX evaluation: Assessing the Effect of the Interpolation Methodology. *International Journal of Climatology*, 36, 900-908. <https://doi.org/10.1002/joc.4391>
- Herrera, S., Gutiérrez, J.M., Ancell, R., Pons, M.R., Frías, M.D., Fernández J. 2012. Development and Analysis of a 50 year high-resolution daily gridded precipitation dataset over Spain (Spain02). *International Journal of Climatology*, 35, 74-85. <https://doi.org/10.1002/joc.2256>
- Homdee, T., Pongput, K., Kanae, S. 2016. A comparative performance analysis of three standardized climatic drought indices in the Chi River basin, Thailand. *Agriculture and Natural Resources*, 50(3), 211-219. <https://doi.org/10.1016/j.anres.2016.02.002>
- Kim, W., Iizumi, T., Nishimori, M. 2019. Global Patterns of Crop Production Losses Associated with Droughts from 1983 to 2009. *Journal of Applied Meteorology and Climatology*, 58(6), 1233-1244. <https://doi.org/10.1175/JAMC-D-18-0174.1>
- King, D.A., Bachelet, D.M., Symstad, A.J., Ferschweiler, K., Hobbins, M. 2015. Estimation of potential evapotranspiration from extraterrestrial radiation, air temperature and humidity to assess future climate change effects on the vegetation of the Northern Great Plains, USA. *Ecological Modelling*, 297, 86-97. <https://doi.org/10.1016/j.ecolmodel.2014.10.037>
- Liu, X., Zhu, X., Pan, Y., Bai, J., Li, S. 2018. Performance of different drought indices for agriculture drought in the North China Plain. *Journal of Arid Land*, 10, 507-516. <https://doi.org/10.1007/s40333-018-0005-2>
- Lopez-Nicolas, A., Pulido-Velazquez, M., Macian-Sorribes, H. 2017. Economic risk assessment of drought impacts on irrigated agriculture. *Journal of Hydrology*, 550, 580-589. <https://doi.org/10.1016/j.jhydrol.2017.05.004>
- Martín Vide, J., Ocina Cantos, J. 2001. *Climas y tiempos de España*. Madrid: Alianza Editorial.
- Martínez, E. 2010. Evaluación del impacto producido por el cambio climático sobre los recursos hídricos de varias cuencas piloto catalanas y navarras. *Tecniberia*, 26, 49-51.
- McKee, T.B., Doesken, N.J., Kleist, J. 1993. *The relationship of drought frequency and duration of time scales*. Anaheim, California: American Meteorological Society, Boston.
- Mishra, A.K., Singh, V.P. 2011. Drought modeling – A review. *Journal of Hydrology*, 403(1-2), 157-175. <https://doi.org/10.1016/j.jhydrol.2011.03.049>
- Ollero Lara, A., Crespo Vergara, S.I., Pérez Cimas, M. 2018. *Las sequías y España. La respuesta del seguro agrario a un problema intermitente*. Madrid: CONAMA.
- Palmer, W.C. 1965. *Meteorological Drought*. Research Paper No. 45, 58. US Weather Bureau, Washington, DC.
- Samper, J., Álvares, D. 2005. *Evaluación de los impactos del cambio climático en los recursos hídricos del río Ebro*. Oficina de Planificación Hidrológica de la Confederación Hidrográfica del Ebro, Dirección General del Agua, Ministerio de Agricultura y Pesca, Alimentación y Medio Ambiente.
- Sheffield, J., Wood, E.F. 2011. *Drought: past problems and future scenarios*. London: Routledge. <https://doi.org/10.4324/9781849775250>
- Trambauer, P., Werner, M., Winsemius, H., Maskey, S., Dutra, E., Uhlenbrook, S. 2014. Hydrological drought forecasting and skill assessment for the Limpopo river basin, Southern Africa. *Hydrology and Earth System Sciences Discussions*, 19, 1695-1711. <https://doi.org/10.5194/hess-19-1695-2015>

Van Loon, A.F., Van Lanen, H.A., Tallaksen, H., Hisdal, L.M., Fendeková, M., Oosterwijk, J., Horvát, O., Machlica, A. 2010. Understanding hydrological winter drought in Europe. Morocco: *Proc. of the Sixth World FRIEND conference*.

Van Loon, A.F., Gleeson, T., Clark, J., Van Dijk, A.I.J.M., Stahl, K., Hannaford, J., Di Baldassarre, G., ... Van Lanen, H.A.J. 2016. Drought in the Anthropocene. *Nature Geoscience*, 9, 89-91. <https://doi.org/10.1038/ngeo2646>

Vicente Serrano, S.M., Beguería, S., Lorenzo-Lacruz, J., Camarero, J.J., López-Moreno, J.I., Azorín-Molina, C., Revuelto, J., Morán-Tejeda, E., Sánchez-Lorenzo, A. 2012. *Análisis comparativo de diferentes índices de sequía para aplicaciones ecológicas, agrícolas e hidrológicas*. Salamanca: Asociación Española de Climatología.

Vicente-Serrano, S.M., Beguería, S., López-Moreno, J.I. 2010. A Multiscalar Drought Index Sensitive to Global Warming: The Standardized Precipitation Evapotranspiration Index. *Journal of climate*, 23, 1696-1718. <https://doi.org/10.1175/2009JCLI2909.1>

Vicente-Serrano, S.M., Lopez-Moreno, J.I., Beguería, S., Sanchez-Lorenzo, A., García-Ruiz, J.M., Azorin-Molina, C., Morán-Tejeda, E., ... Espejo, F. 2014. Evidence of increasing drought severity caused by temperature rise in southern Europe. *Environmental Research Letters*, 9(4). <https://doi.org/10.1088/1748-9326/9/4/044001>
